# Supplementary material for: The protein kinase Ire1 has a Hac1-independent essential role in iron uptake and virulence of Candida albicans
Source: PubMed Central journal article supplement (PMC8846550; doi:10.1371/journal.ppat.1010283), 2022-02-02
Supplement: ppat.1010283.s001.pdf [file ppat.1010283.s001.pdf]

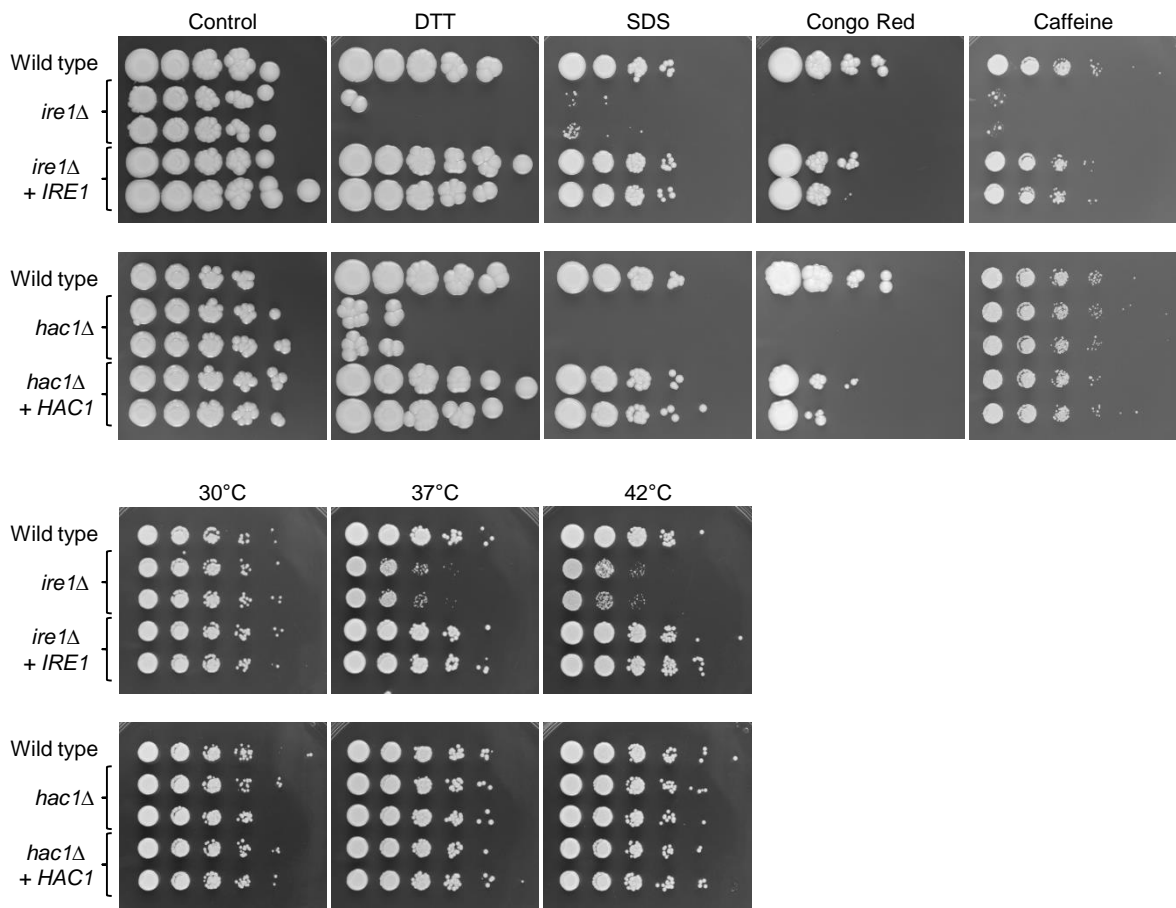

**Fig S1. Sensitivity of *ire1Δ* and *hac1Δ* mutants and complemented strains to ER and cell membrane/wall stress and elevated temperatures.** YPD overnight cultures of the strains were diluted to an optical density ( $OD_{600}$ ) of 2.0. Serial 10-fold dilutions were spotted on YPD plates without (control) or with 10 mM DTT, 0.04% SDS, 50  $\mu$ g/ml Congo Red, or 15 mM caffeine and incubated for 4 days at 30°C. YPD plates were also incubated for 24 h at 30°C, 37°C and 42°C. Both independently generated series of mutants are shown in each case.
