# Supplementary material for: The protein kinase Ire1 has a Hac1-independent essential role in iron uptake and virulence of Candida albicans
Source: PubMed Central journal article supplement (PMC8846550; doi:10.1371/journal.ppat.1010283), 2022-02-02
Supplement: ppat.1010283.s002.pdf [file ppat.1010283.s002.pdf]

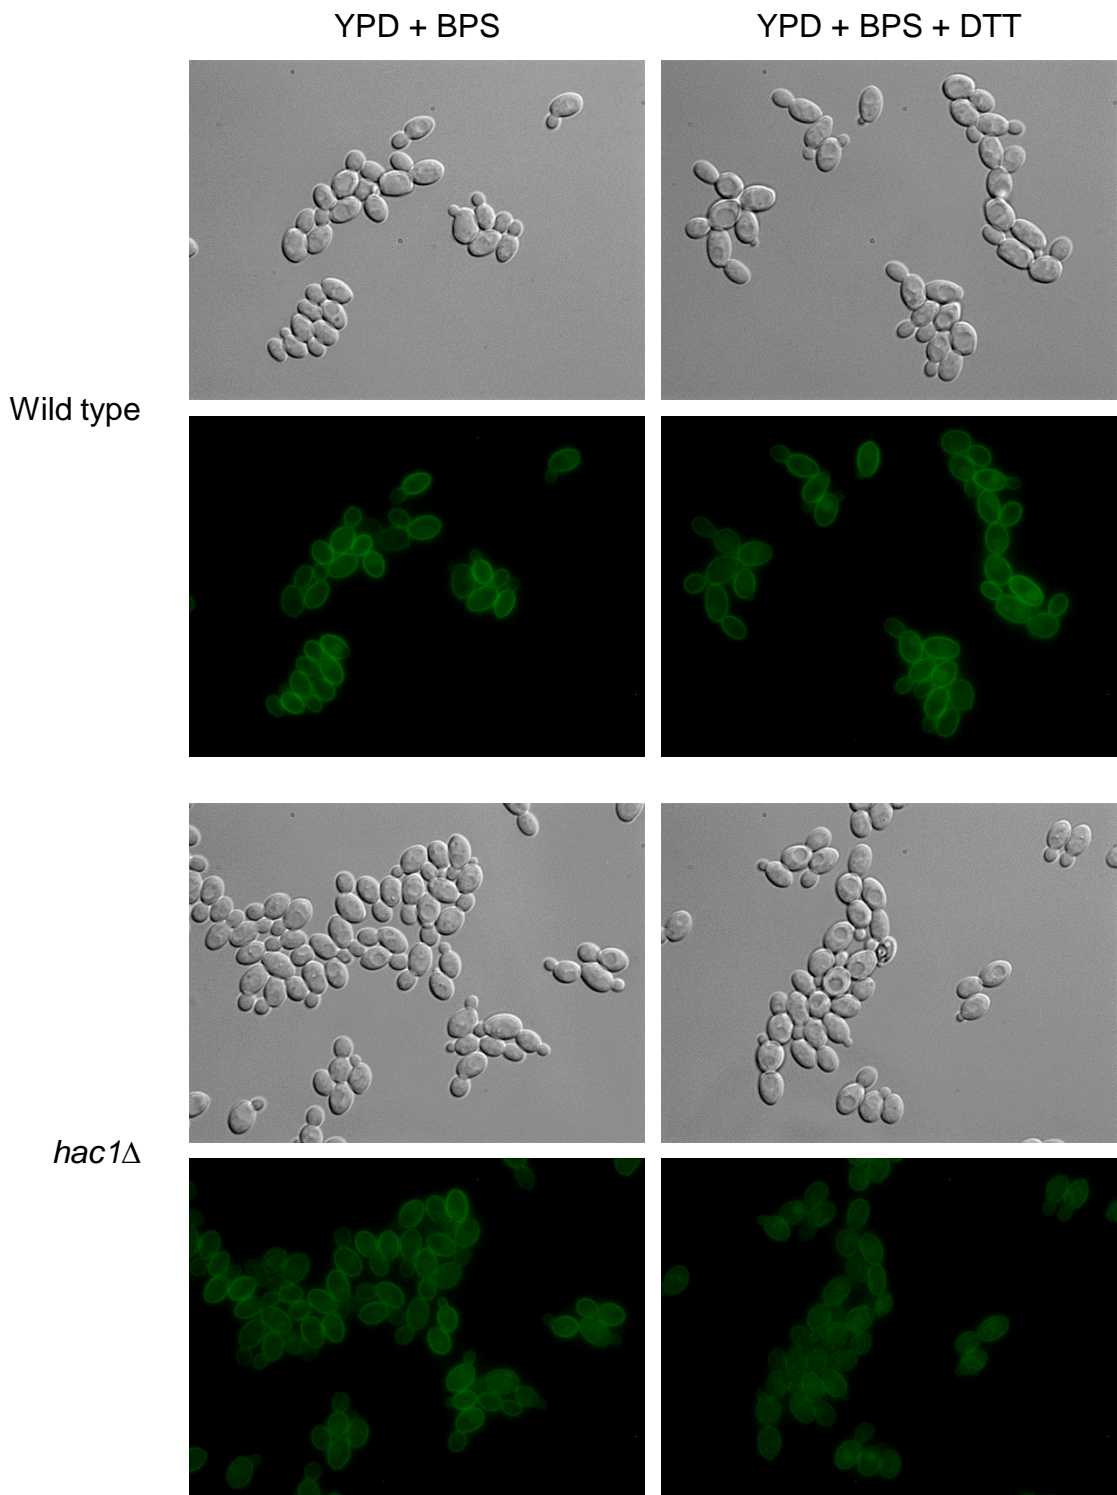

**Fig S2. Hac1 contributes to correct Ftr1 localization under conditions of both iron limitation and ER stress.** Overnight cultures of wild-type and *hac1Δ* strains containing a GFP-tagged *FTR1* allele were inoculated in fresh YPD medium with 500  $\mu$ M BPS in the absence or presence of 5 mM DTT. After 5 h of incubation at 30°C cells were imaged by DIC and fluorescence microscopy.
