# Supplementary material for: The protein kinase Ire1 has a Hac1-independent essential role in iron uptake and virulence of Candida albicans
Source: PubMed Central journal article supplement (PMC8846550; doi:10.1371/journal.ppat.1010283), 2022-02-02
Supplement: ppat.1010283.s008.pdf [file ppat.1010283.s008.pdf]

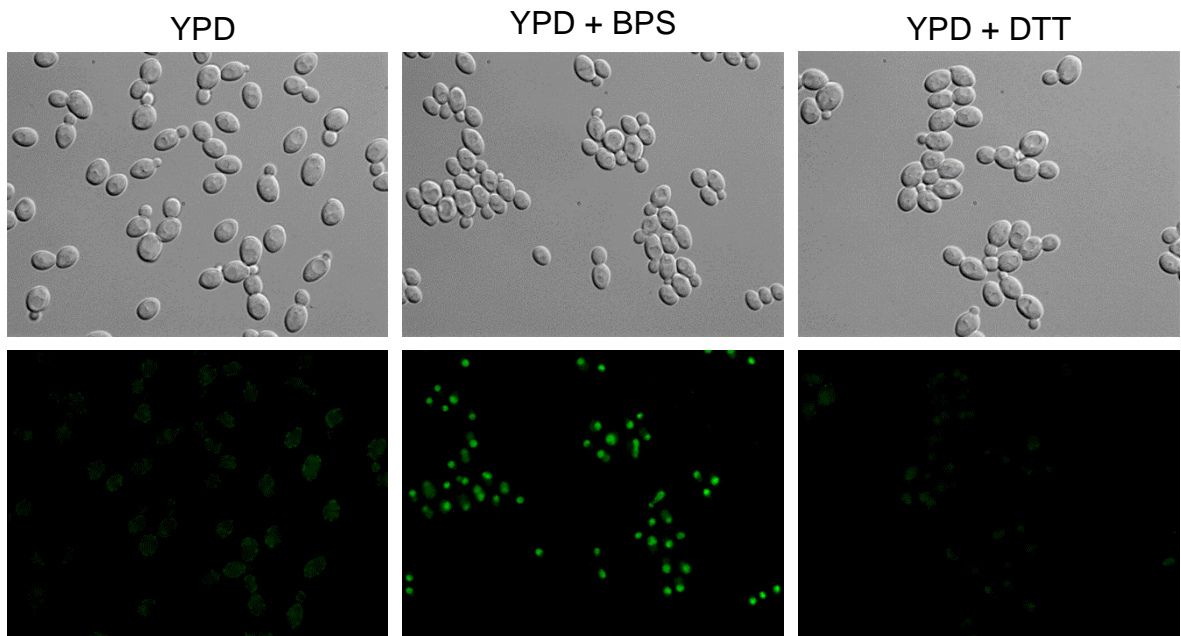

**Fig R1. Effect of DTT treatment on Sef1 upregulation and localization.** Overnight cultures of wild-type cells carrying a *GFP*-tagged *SEF1* allele were inoculated in fresh YPD medium without or with 500  $\mu$ M BPS or 5 mM DTT. After 5 h of incubation at 30°C cells were imaged by DIC and fluorescence microscopy.
