# Supplementary material for: The protein kinase Ire1 has a Hac1-independent essential role in iron uptake and virulence of Candida albicans
Source: PubMed Central journal article supplement (PMC8846550; doi:10.1371/journal.ppat.1010283), 2022-02-02
Supplement: ppat.1010283.s009.pdf [file ppat.1010283.s009.pdf]

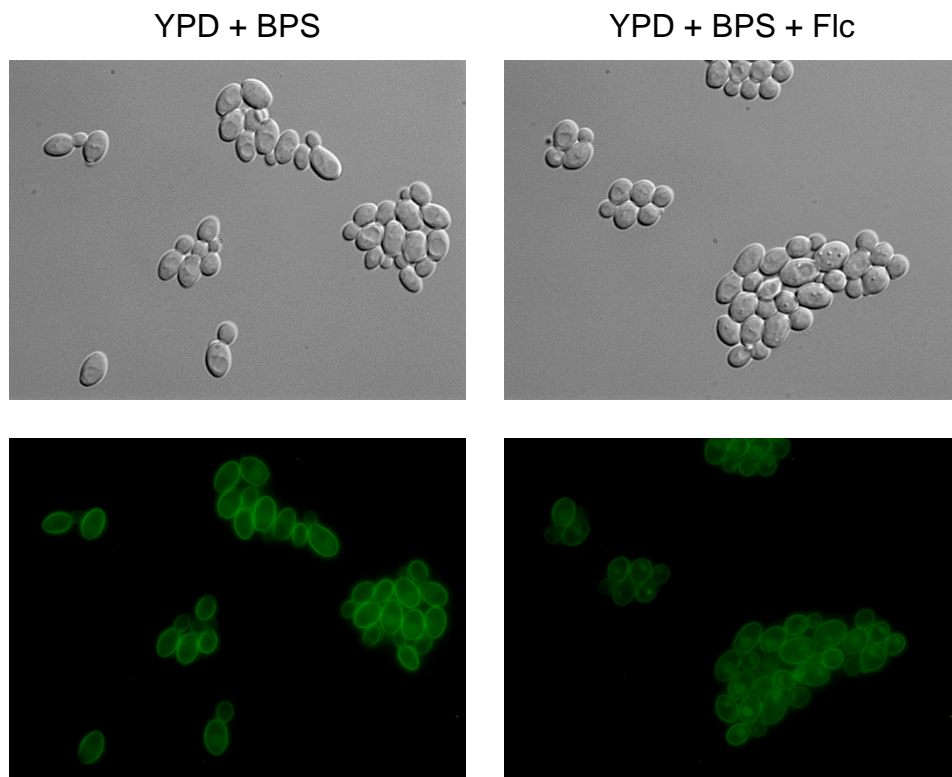

**Fig R2. Effect of fluconazole treatment on Ftr1 localization.** Overnight cultures of wild-type cells carrying a *GFP*-tagged *FTR1* allele were inoculated in fresh YPD medium with 500  $\mu$ M BPS in the absence or presence of 10  $\mu$ g/ml fluconazole (Flc). After 5 h of incubation at 30°C cells were imaged by DIC and fluorescence microscopy.
