# Supplementary material for: The protein kinase Ire1 has a Hac1-independent essential role in iron uptake and virulence of Candida albicans
Source: PubMed Central journal article supplement (PMC8846550; doi:10.1371/journal.ppat.1010283), 2022-02-02
Supplement: ppat.1010283.s010.pdf [file ppat.1010283.s010.pdf]

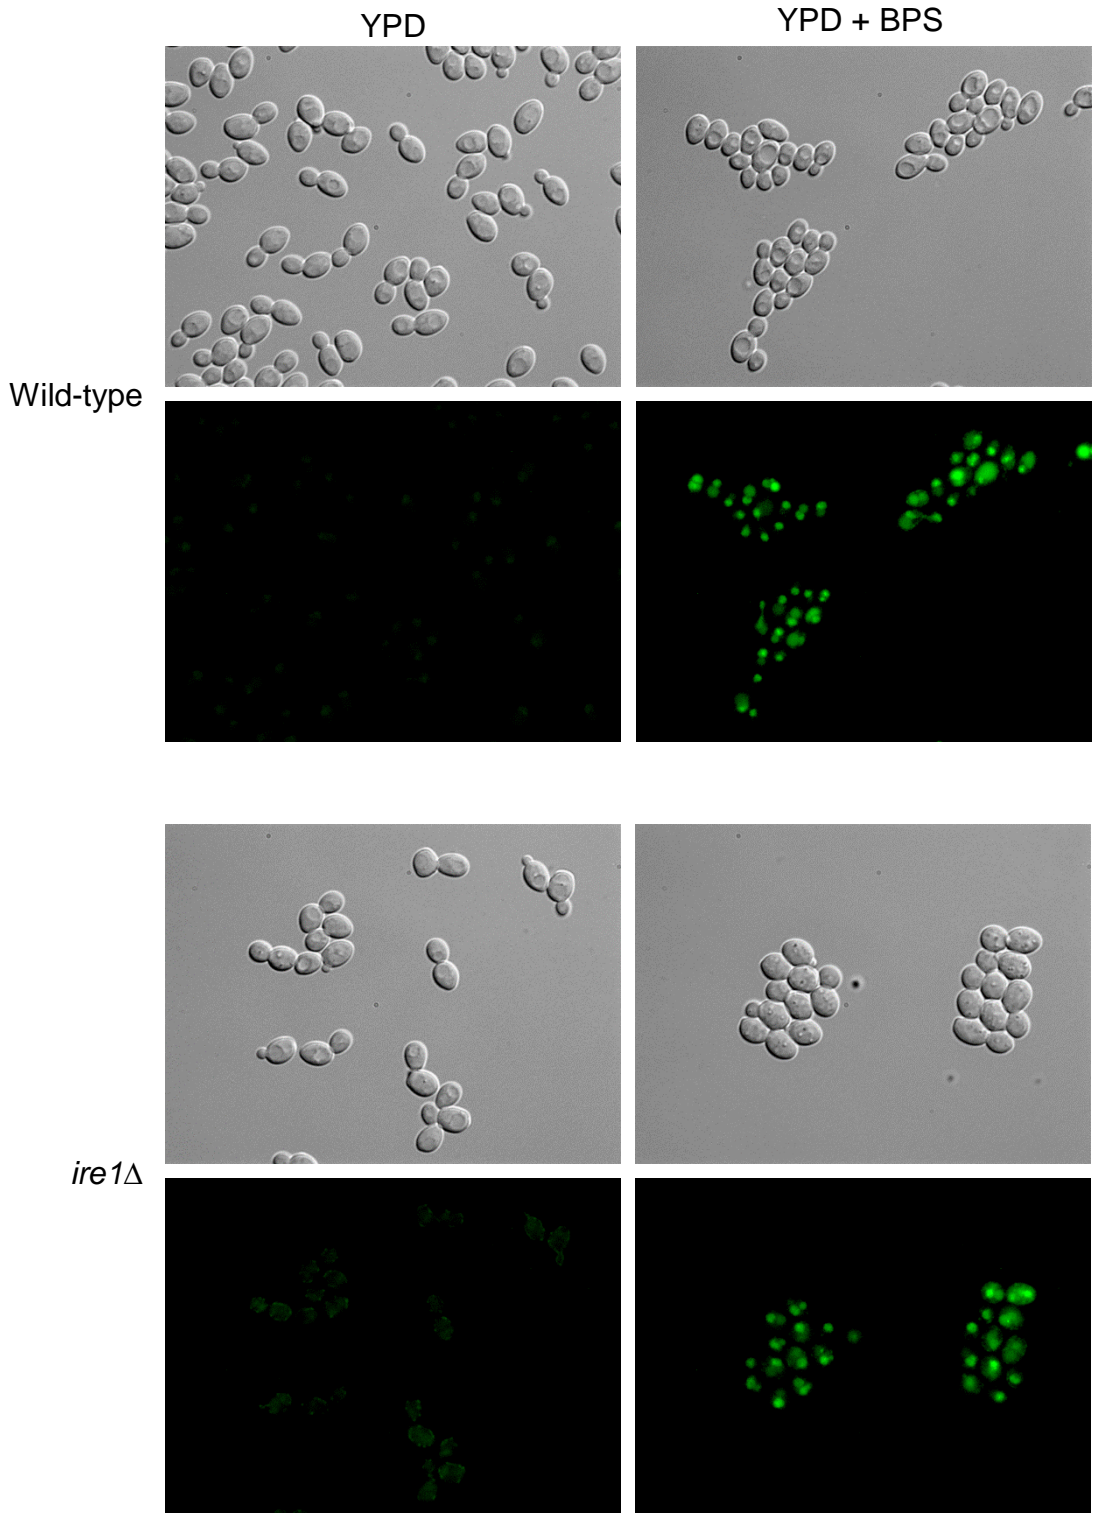

**Fig R3. *Sef1* upregulation and nuclear localization are not affected in *ire1* $\Delta$  mutants.** Overnight cultures of wild-type cells carrying a *GFP*-tagged *SEF1* allele were inoculated in fresh YPD medium without or with 500  $\mu$ M BPS. After 5 h of incubation at 30°C cells were imaged by DIC and fluorescence microscopy.
